# Supplementary material for: Controlled growth of concave gold nanobars with high surface-enhanced Raman-scattering and excellent catalytic activities
Source: Royal Society of Chemistry journal article supplement (doi:10.1039/c3nr01363d), 2013-01-01
Supplement: c3nr01363d.pdf [file c3nr01363d.pdf]

## Electronic Supplementary Information

# Controlled Growth of Concave Gold Nanobars with High Surface-Enhanced Raman-Scattering and Excellent Catalytic Activities

Lin-fei Zhang and Chun-yang Zhang\*

Single-Molecule Detection and Imaging Laboratory, Shenzhen Institutes of Advanced Technology, Chinese Academy of Sciences, Guangdong 518055, China

### Supplementary Results

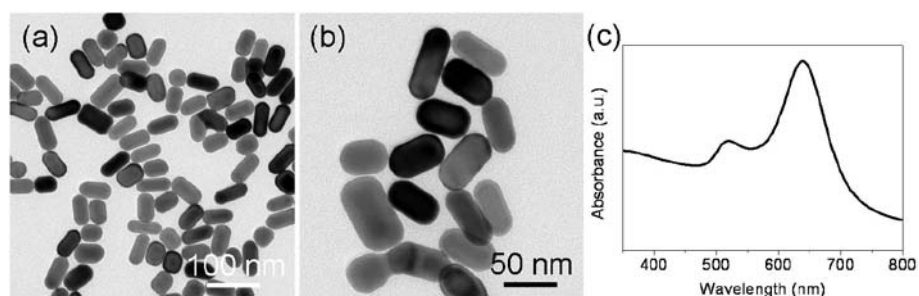

**Figure S1.** (a, b) TEM images and (c) UV/vis spectra of rod-shaped gold seeds (AR = 2.2).

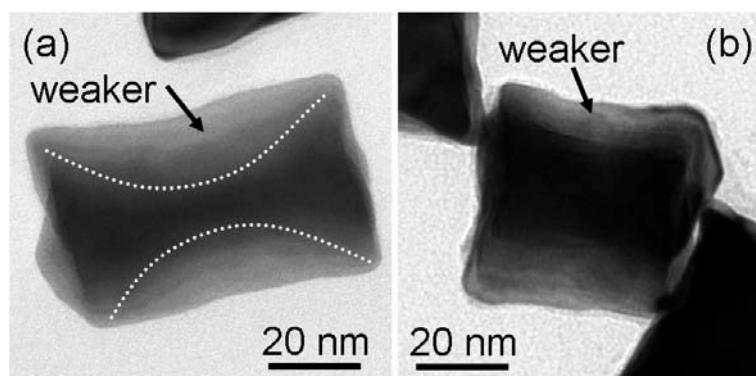

**Figure S2.** (a, b) High-magnification TEM images of single concave nanobar.

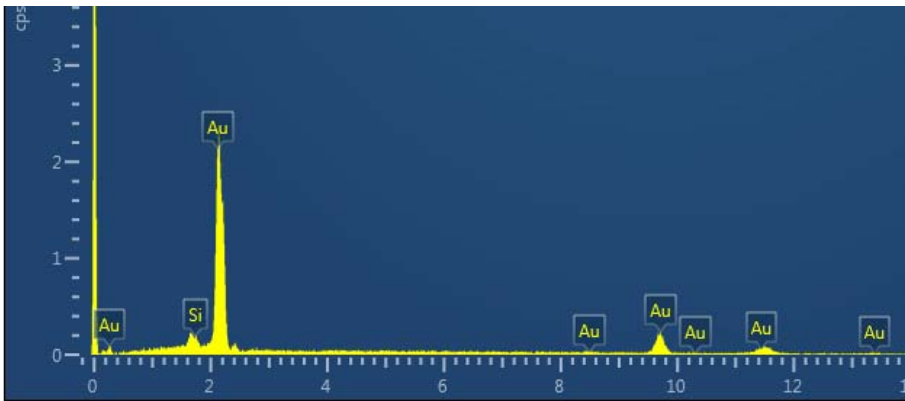

**Figure S3.** The energy dispersive X-ray spectroscopy (EDS) indicates that the obtained nanocrystals are composed of only gold.

**Table S1.** Projection angles and geometrical parameters of concave cuboids bounded by different types of high-index facets.

| Projection direction | Geometrical model of the polyhedron                                                 | Equation for the projection angle | Calculated projection angle |          |
|----------------------|-------------------------------------------------------------------------------------|-----------------------------------|-----------------------------|----------|
| [001]                |  | $\alpha = \arctan(k/h)$           | {h k 0}                     | $\alpha$ |
|                      |                                                                                     |                                   | {2 1 0}                     | 26.5°    |
|                      |                                                                                     |                                   | {4 1 0}                     | 14.0°    |
|                      |                                                                                     |                                   | {7 2 0}                     | 15.9°    |
|                      |                                                                                     |                                   | {3 1 0}                     | 18.4°    |
|                      |                                                                                     |                                   | {8 3 0}                     | 20.6°    |
|                      |                                                                                     |                                   | {5 2 0}                     | 21.8°    |
|                      |                                                                                     |                                   | {7 3 0}                     | 23.2°    |

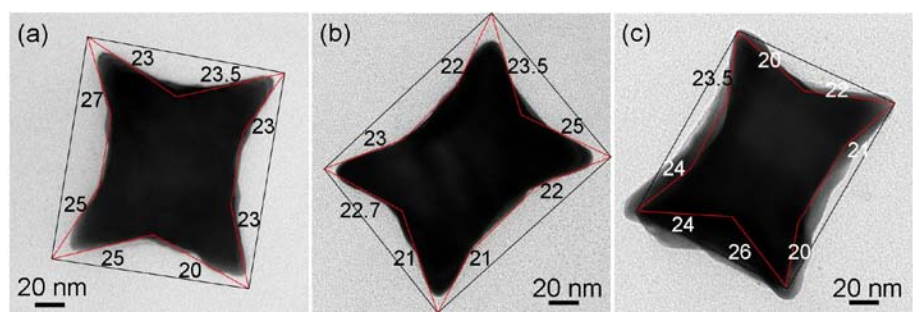

**Figure S4.** (a, b, c) TEM images of a single concave rectangular gold bar and its interfacial angles.

**Table S2.** Projection angles between {100} facets from the concave rectangular nanocrystals in Figure S4.

| Particle # | $\theta_1$      | $\theta_2$ | $\theta_3$ | $\theta_4$ | $\theta_5$                 | $\theta_6$ | $\theta_7$ | $\theta_8$ |
|------------|-----------------|------------|------------|------------|----------------------------|------------|------------|------------|
| a          | 23°             | 23.5 °     | 23 °       | 23 °       | 18 °                       | 25 °       | 23.5 °     | 27 °       |
| b          | 23.5 °          | 25 °       | 22 °       | 21 °       | 21 °                       | 23.2 °     | 23 °       | 22 °       |
| c          | 20 °            | 22 °       | 21 °       | 20 °       | 26 °                       | 24 °       | 24 °       | 23.5 °     |
| Summary    | average: 22.8 ° |            |            |            | absolute deviation: 1.65 ° |            |            |            |

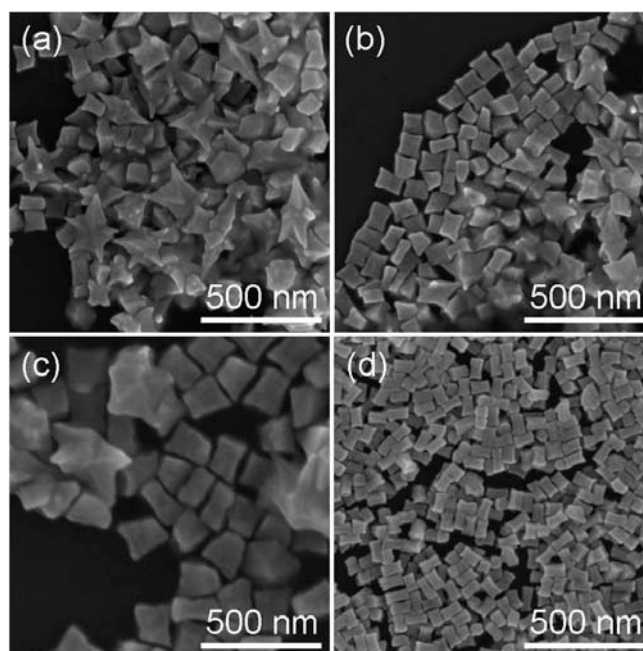

**Figure S5.** SEM images of aqueous suspensions of gold nanocrystals prepared with different amounts of seed solution: (a) 40, (b) 60, (c) 80, and (d) 100  $\mu\text{L}$ .

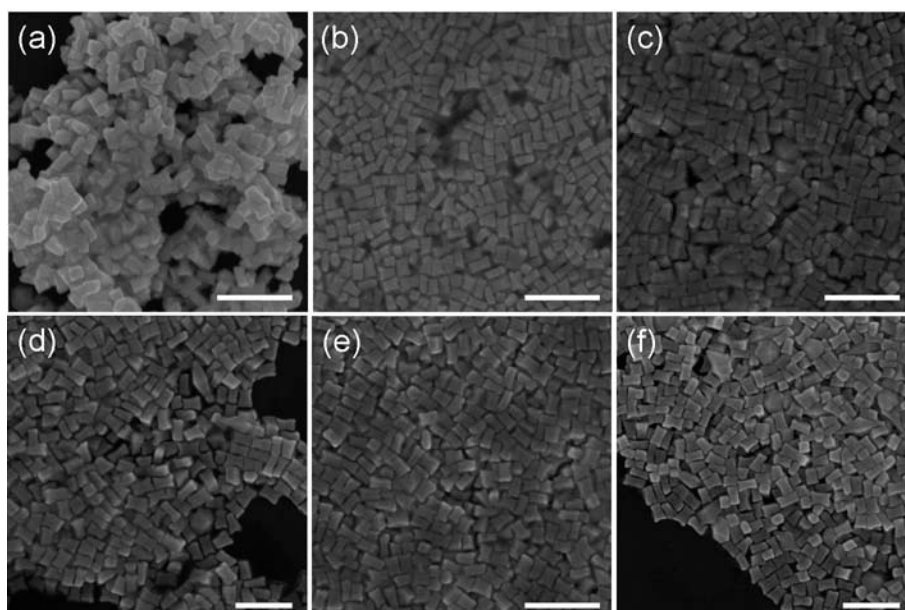

**Figure S6.** SEM images of aqueous suspensions of gold nanocrystals prepared with different amounts of ascorbic acid: (a) 55, (b) 65, (c) 80, (d) 100, (e) 120, and (f) 150  $\mu\text{L}$ . The scale bar is 500 nm.

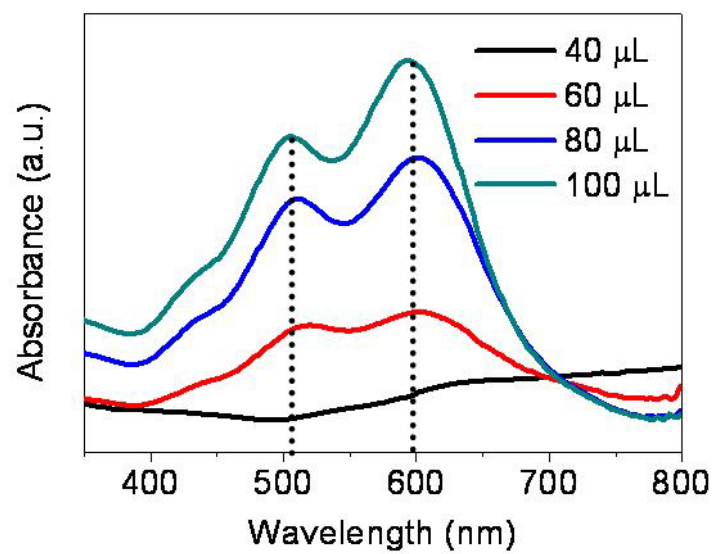

**Figure S7.** UV/vis spectra of aqueous suspensions of gold nanocrystals prepared with different amounts of seed solution.

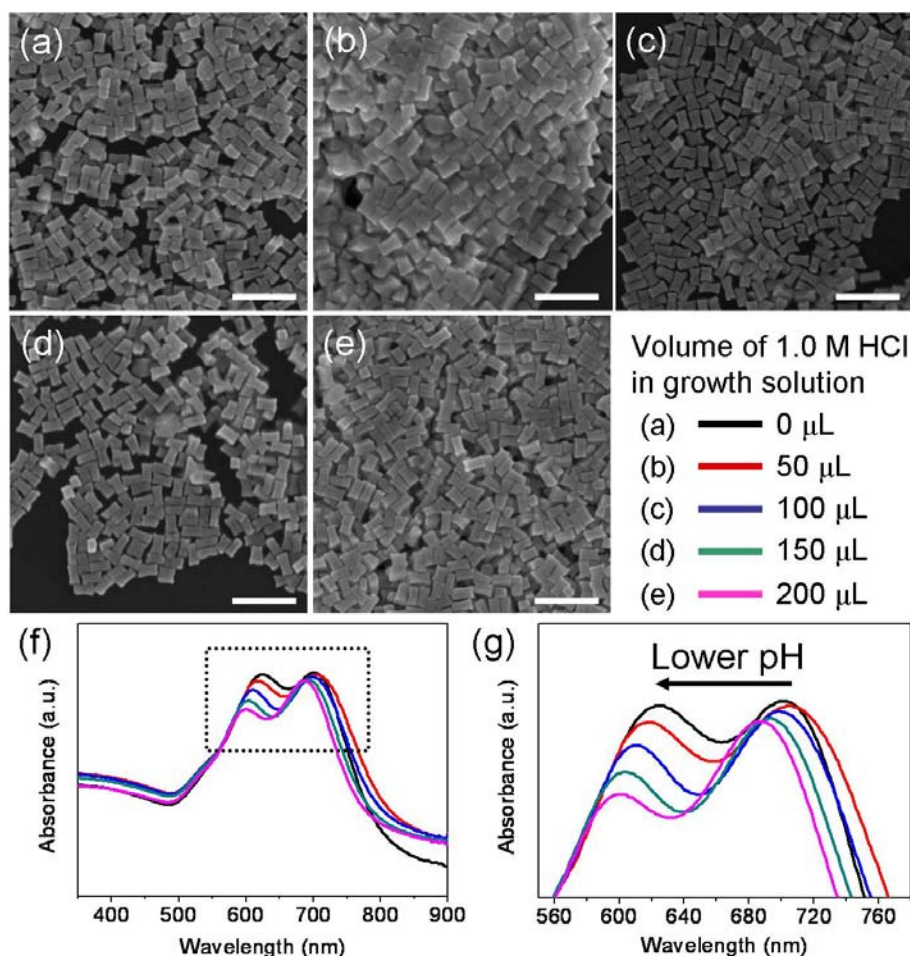

**Figure S8.** SEM images of concave gold nanocrystals prepared in growth solutions containing (a) 0, (b) 50, (c) 100, (d) 150, and (e) 200  $\mu\text{L}$  of 1.0 M HCl. The scale bar is 300 nm. (f) UV/vis spectra of the particles in (a-e) display a gradual blue-shift of SPR with the decreasing pH value. (g) Magnified UV/vis spectra of the region marked with a box in (f).

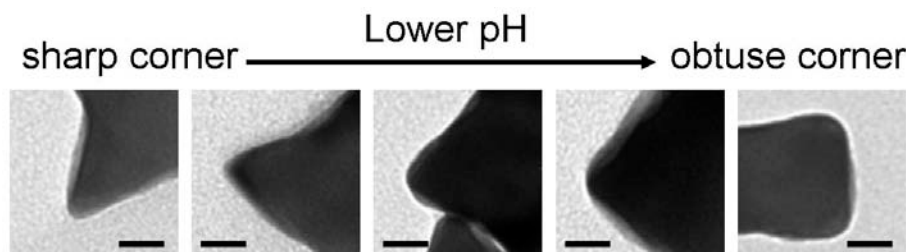

**Figure S9.** TEM images of concave gold nanocrystals prepared in growth solutions containing different amount of HCl. The scale bars is 20 nm.



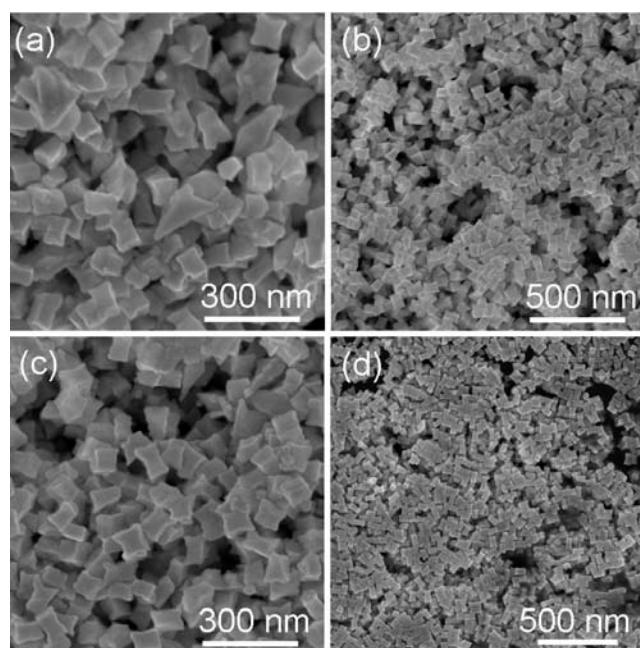

**Figure S10.** SEM images of concave gold nanocrystals prepared in growth solutions containing (a) 0.05, (b) 0.2, (c) 0.3 M CTAB. (d) TEM image of concave gold nanocrystals prepared in growth solutions containing 0.05 M NaBr and 0.05 M CTAB.

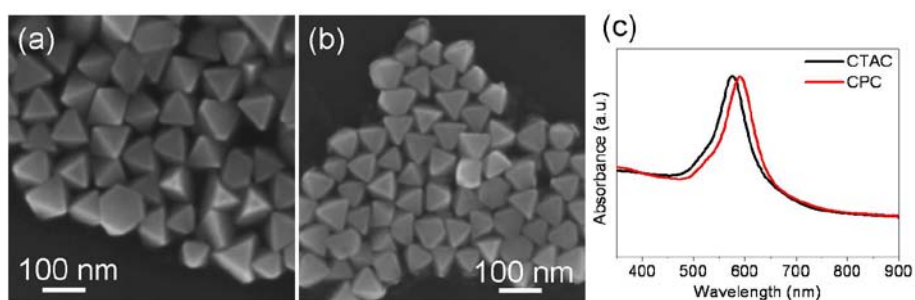

**Figure S11.** SEM images of gold nanocrystals prepared with (a) cetyltrimethylammonium chloride (CTAC), and (b) cetylpyridinium chloride (CPC). (c) UV/vis spectra of octahedra prepared in the presence of CTAC and CPC, respectively.

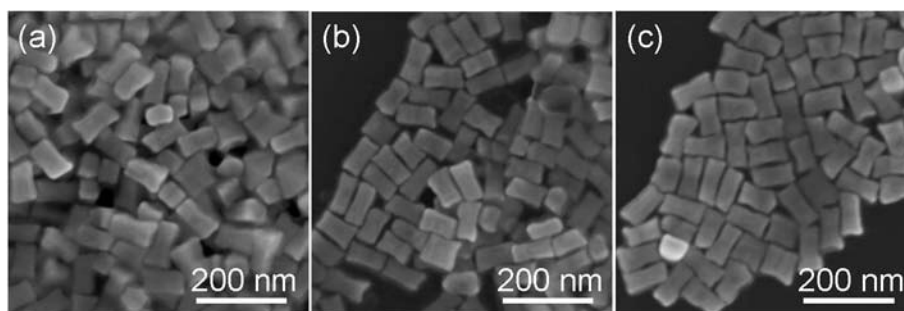

**Figure S12.** SEM images of gold nanocrystals obtained at different AR seed solution: (a) AR = 2.2, (b) AR = 2.5, (c) AR = 2.8.

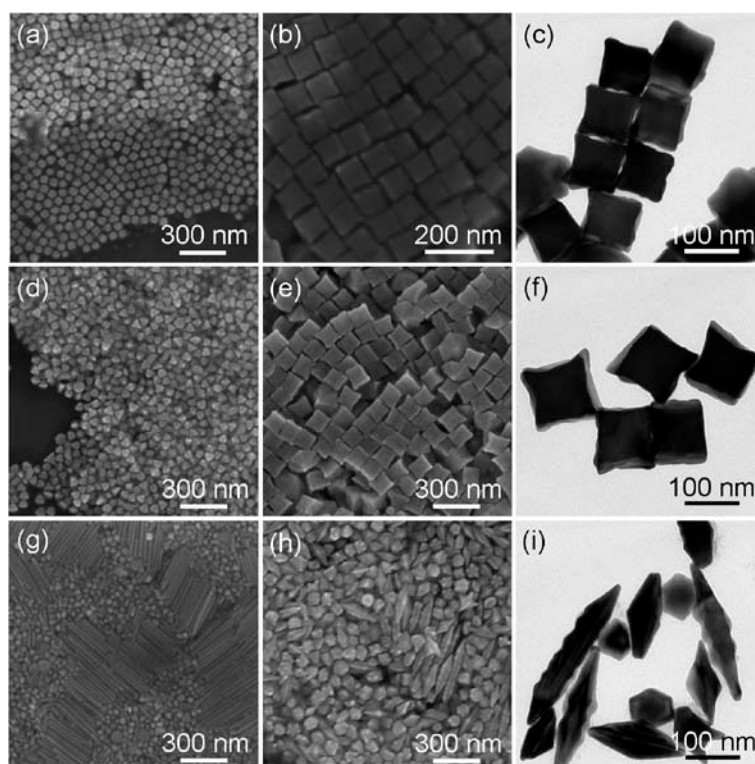

**Figure S13.** Influence of seed morphology on the final product. SEM images of gold nanocubes (a), octahedra (d), and irregular particles (g) used as the seeds for the growth of gold nanocrystals with concave features. SEM (b, e, h) and TEM (c, f, i) images of the products obtained from the corresponding seeds.



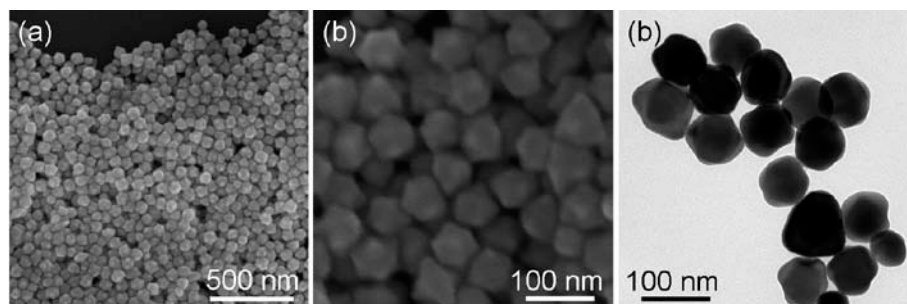

**Figure S14.** SEM and TEM images of trisoctahedra prepared in the presence of CTAC.

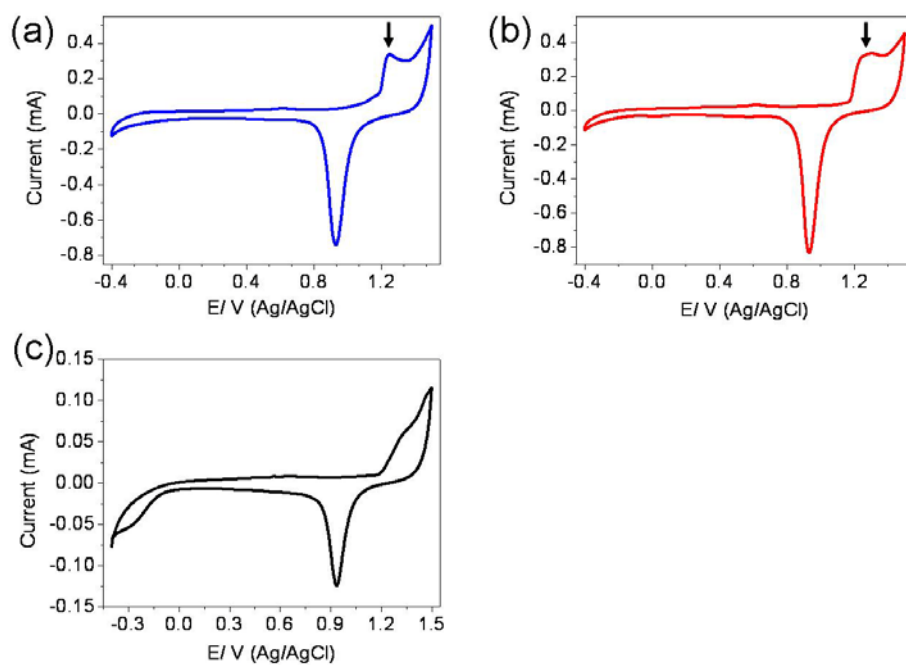

**Figure S15.** Cyclic voltammograms of concave gold cuboid (a), gold trisoctahedra (b), and gold octahedra (c) at  $50 \text{ mV} \cdot \text{S}^{-1}$  in  $0.5 \text{ M H}_2\text{SO}_4$ .

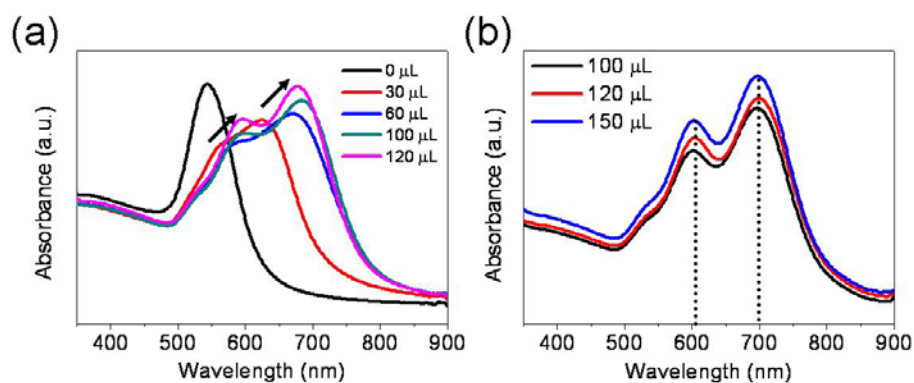

**Figure S16.** (a, b) UV/vis spectra of concave gold nanobars obtained with different volume of  $\text{AgNO}_3$ .

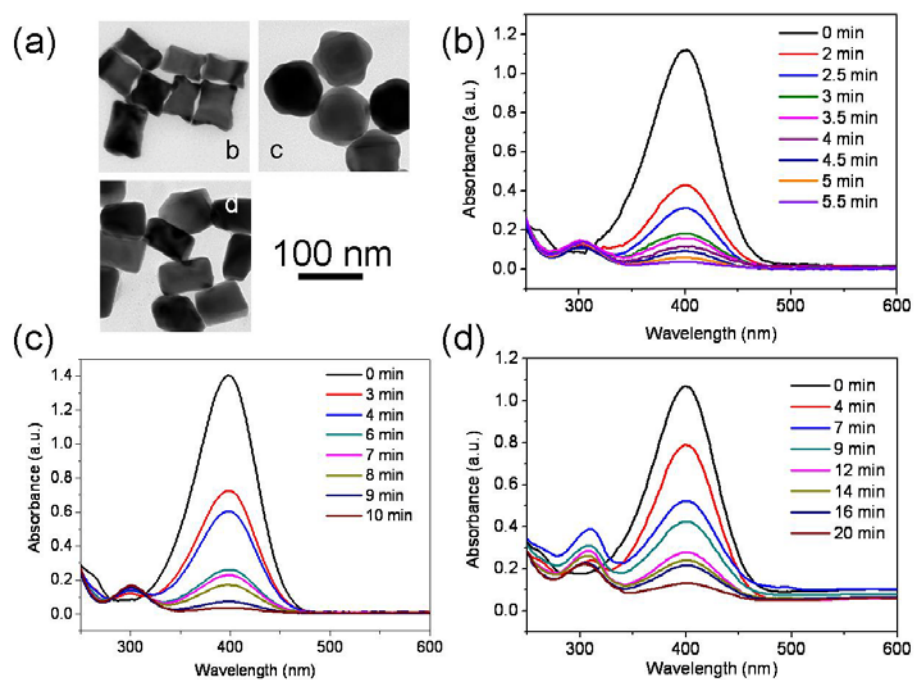

**Figure S17.** (a) Typical TEM images of gold nanocrystals used in (b-d). (b-d) UV/vis spectra show the gradual reduction of *p*-nitrophenol by concave nanobar (b), concave trisoctahedral (c), and rectangular nanobar (d) gold nanocrystals at room temperature, respectively.

**Calculation of the total number of gold atoms contained in a gold nanobar enclosed by {100} or {730} facets, and the total number of gold atoms on the surface.<sup>4,5</sup>**

**(a) Conventional nanobars enclosed by {100} facets**

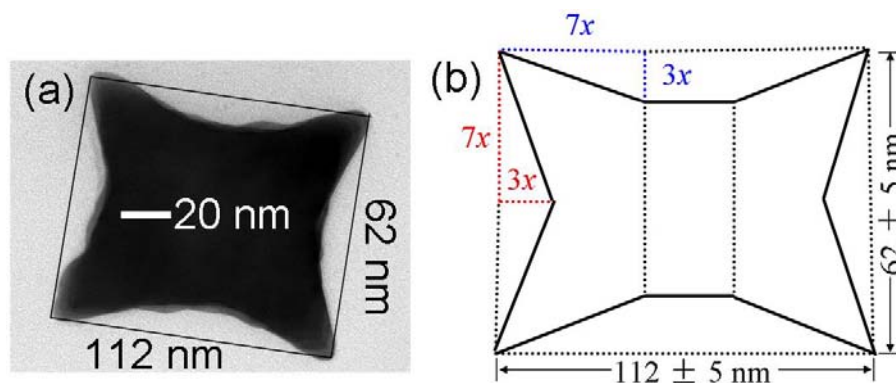

**Figure S18.** TEM image of (a) a concave rectangular gold nanocrystal and (b) its projection.

The nanocrystal is viewed along the [001] axis.

The TEM image shows a rectangular gold concave nanobar with an average width of  $62 \pm 5$  nm and length of  $112 \pm 5$  nm (Figure S18a). Since the concave gold nanocrystal is enclosed by {730} facets, the length ratio between the two perpendicular sides of right triangle indicated in red is 7:3. With the assumption that one side is  $7x$  and the other side is  $3x$ , the value of  $x$  is calculated from the nanocrystal width to be  $x = (62 \text{ nm}) / (7 + 7) = 4.43 \text{ nm}$ . Other related lengths are also calculated and shown in Figure S18b.

### **(1) Number of gold atoms contained in a nanobars**

In a gold nanobar with rectangular side facets and an average aspect ratio of 1.8 ( $112 \pm 5$  nm long,  $62 \pm 5$  nm wide, and  $62 \pm 5$  nm high), its volume is  $(112 \text{ nm} \times 62 \text{ nm} \times 62 \text{ nm}) = 4.305 \times 10^5 \text{ nm}^3$ . Gold has a face-centered-cubic structure with a lattice constant of 0.408 nm.

The volume of a unit cell is  $(0.408 \text{ nm})^3 = 0.068 \text{ nm}^3$ . Each unit cell contains 4 gold atoms. As a result, the total number of gold atoms in a single gold nanobar is  $(4.305 \times 10^5 \text{ nm}^3) / (0.068 \text{ nm}^3) \times 4 = 2.532 \times 10^7$ .

## **(2) Number of gold atoms on the surface of a nanobar**

A gold nanobar is enclosed by six {100} facets. The total surface area is  $(112 \text{ nm} \times 62 \text{ nm}) \times 4 + (62 \text{ nm} \times 62 \text{ nm}) \times 2 = 3.546 \times 10^4 \text{ nm}^2$ . Each two-dimensional unit cell on the {100} facets contains 2 gold atoms, and the area of this unit cell is  $(0.408 \text{ nm})^2 = 0.166 \text{ nm}^2$ . The total number of gold atoms on the surface of a single nanobar is  $(3.546 \times 10^4 \text{ nm}^2) / (0.166 \text{ nm}^2) \times 2 = 4.261 \times 10^5$ .

## **(3) Total number of gold atoms on the surface of nanobars used in the catalytic reaction**

The total number of gold atoms in the catalyst is  $(25 \times 10^{-3} \text{ mL} \times 2.8 \times 10^{-3} \text{ g/mL}) / (196.9665 \text{ g/mol}) \times (6.02 \times 10^{23} \text{ mol}^{-1}) = 2.14 \times 10^{17}$ . The number of gold nanobars involved in the catalytic reaction is  $(2.14 \times 10^{17}) / (2.532 \times 10^7) = 8.452 \times 10^9$ . The total number of gold atoms on the surface of gold nanobars used in the catalytic reaction is  $(4.261 \times 10^5) \times (8.452 \times 10^9) = 3.601 \times 10^{15}$ .

**(b) Concave nanobars enclosed by {730} facets**

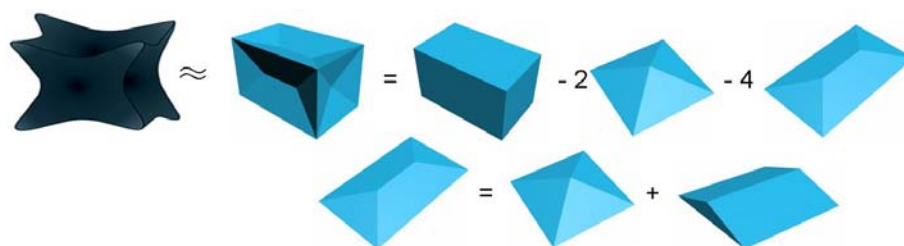

**Figure S19.** Schematic illustration for the decomposition of a concave rectangular gold nanocrystal into a cuboid, 2 square pyramids, and 4 elongated pyramids, and the decomposition of an elongated pyramid into a square pyramid and a triangular prism.

**(1) Volume of a single concave nanobar**

The gold concave nanobar with an average aspect ratio of 1.8 ( $112 \pm 5$  nm long,  $62 \pm 5$  nm wide, and  $62 \pm 5$  nm high) can be considered as a bar with 2 square pyramid and 4 rectangular pyramids excavated at the center of transverse and longitudinal face. The volume of a bar is  $(112 \text{ nm} \times 62 \text{ nm} \times 62 \text{ nm}) = 4.305 \times 10^5 \text{ nm}^3$ . The volume of a square pyramid is  $1/3 \times (62 \text{ nm})^2 \times (3 \times 4.43 \text{ nm}) = 1.70 \times 10^4 \text{ nm}^3$ , and the volume of a triangular prism is  $1/3 \times (1/2 \times 62 \text{ nm} \times 3 \times 4.43 \text{ nm}) \times (112 - 62 \text{ nm}) = 6.8665 \times 10^3 \text{ nm}^3$ . As a result, the volume of a concave nanobar is  $(4.305 \times 10^5 \text{ nm}^3) - 6 \times (1.70 \times 10^4 \text{ nm}^3) - 4 \times (6.8665 \times 10^3 \text{ nm}^3) = 3.01 \times 10^5 \text{ nm}^3$  (see Figure S19).

**(2) Number of gold atoms in a concave nanobar**

The number of gold atoms contained in a single gold concave nanobar is  $(3.01 \times 10^5 \text{ nm}^3) / (0.068 \text{ nm}^3) \times 4 = 1.77 \times 10^7$ .



### (3) Number of gold atoms on the surface of a concave nanobar

The atomic density of {730} facets is 3/7 of that of {100} facets. In a typical bar with 112 nm long, 62 nm wide, and 62 nm high, the total surface area of the bar is  $(112 \text{ nm} \times 62 \text{ nm}) \times 4 + (62 \text{ nm} \times 62 \text{ nm}) \times 2 = 3.546 \times 10^4 \text{ nm}^2$ . The total number of gold atoms on the {730} facets of a single concave nanobar is  $(3.546 \times 10^4 \text{ nm}^2) / (0.166 \text{ nm}^2) \times 2 \times 3/7 = 1.831 \times 10^5$ .

### (4) Total number of gold atoms on the surface of concave nanobars in the catalytic reaction

The total number of gold atoms in the catalytic reaction is  $2.14 \times 10^{17}$ . The number of gold concave nanobars in the catalytic reaction is  $(2.14 \times 10^{17}) / (1.77 \times 10^7) = 1.21 \times 10^{10}$ . As a result, the total number of gold atoms on the surface of concave nanobars in the catalytic reaction is  $(1.831 \times 10^5) \times (1.21 \times 10^{10}) = 2.22 \times 10^{15}$ .

**Table S3.** Conversion yields for the reduction of *p*-nitrophenol to *p*-aminophenol with the gold nanobars enclosed by a concave or flat surface as the catalyst.

| Gold catalyst    | Reaction time | Yield (%) | Number of surface atoms |
|------------------|---------------|-----------|-------------------------|
| rectangular bars | 5 min         | 34.7      | $3.60 \times 10^{15}$   |
| concave bars     | 5 min         | 94.5      | $2.22 \times 10^{15}$   |
| trisoctahedra    | 5 min         | 74.2      | No calculation          |

## References

- (1) B. Nikoobakht and M. A. El-Sayed, *Chem. Mater.* 2003, **15**, 1957.
- (2) A. Gole and C. J. Murphy, *Chem. Mater.* 2004, **16**, 3633.
- (3) C. J. Murphy, T. K. San, A. M. Gole, C. J. Orendorff, J. X. Gao, L. Gou, S. E. Hunyadi and T. Li, *J. Phys. Chem. B* 2005, **109**, 13857.
- (4) M. S. Jin, H. Zhang, Z. X. Xie and Y. N. Xia, *Angew. Chem. Int. Ed.* 2011, **50**, 7850.
- (5) F. Wang, C. H. Li, L. D. Sun, H. S. Wu, T. Ming, J. F. Wang, J. C. Yu and C. H. Yan, *J. Am. Chem. Soc.* 2011, **133**, 1106.
